# Supplementary material for: Ultrasensitive UV-NIR broadband phototransistors based on AgBiS2–organic hybrid films
Source: Royal Society of Chemistry journal article supplement (doi:10.1039/d1tc01798e), 2021-01-01
Supplement: d1tc01798e1.pdf [file d1tc01798e1.pdf]

## Supporting information

### **Ultrasensitive UV-NIR Broadband Phototransistors Based on AgBiS<sub>2</sub>-organic Hybrid Films**

*Li Jiang<sup>#</sup>, Huihuang Huang<sup>#</sup>, Fubing Gui, Yalun Xu and Qianqian Lin\**

Key Lab of Artificial Micro- and Nano-Structures of Ministry of Education of China,  
School of Physics and Technology, Wuhan University, Wuhan 430072, P. R. China

<sup>#</sup> These authors contributed equally: Li Jiang and Huihuang Huang

**Keywords:** Phototransistors, AgBiS<sub>2</sub>, silver bismuth sulfide, C8-BTBT

#### **Corresponding Authors:**

\*Email: [q.lin@whu.edu.cn](mailto:q.lin@whu.edu.cn);

## Supporting figures

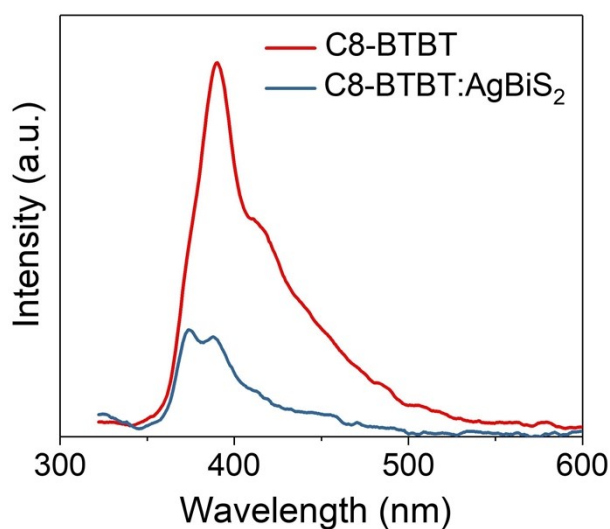

**Fig. S1** Typical PL spectra of the pristine C8-BTBT and C8-BTBT:AgBiS<sub>2</sub> hybrid films.

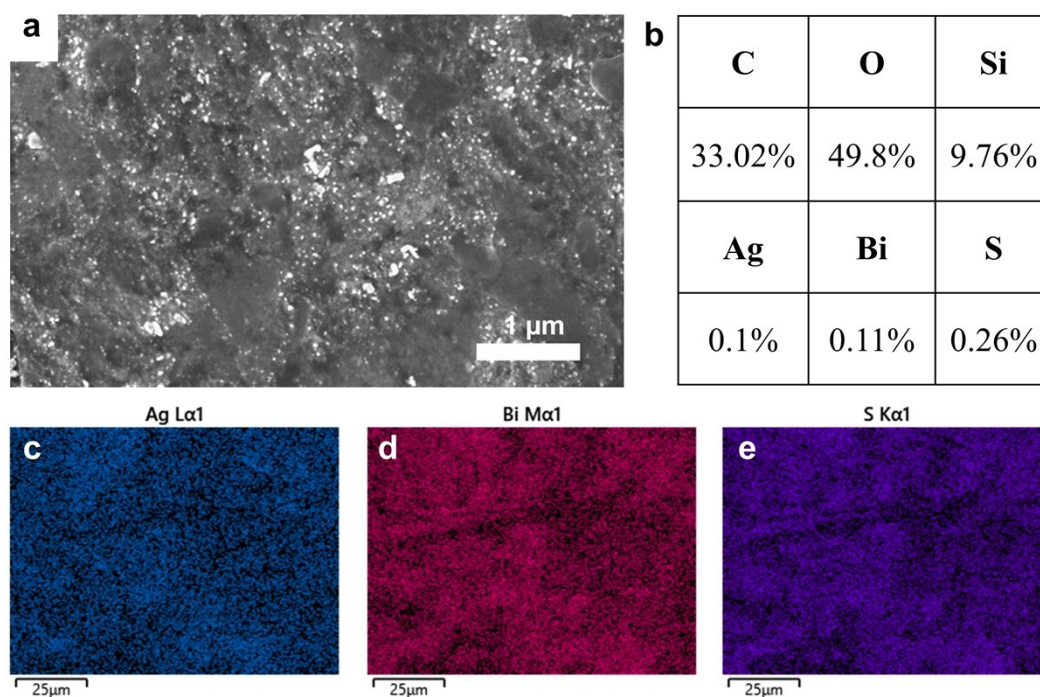

**Fig. S2** (a) Typical SEM image of the hybrid films, (b) element statistics of the hybrid films on glass substrates and (c-e) EDX profiles of the SEM samples.

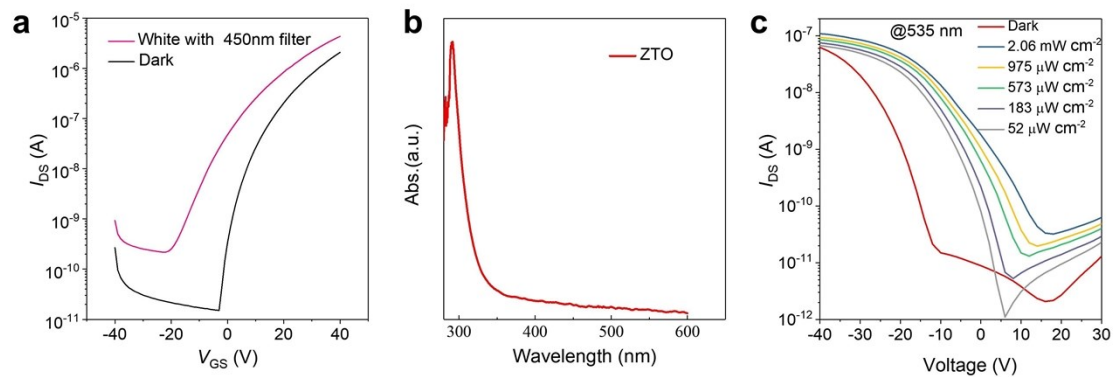

**Fig. S3** (a) Transfer curves of ZTO based phototransistors in dark and under white light filtered with 450 nm long-pass filter, (b) typical absorption spectrum of ZTO films, (c) transfer curves of the AgBiS<sub>2</sub>-organic hybrid phototransistors with SiO<sub>2</sub>/Si substrates in dark and under illumination with various light intensity.

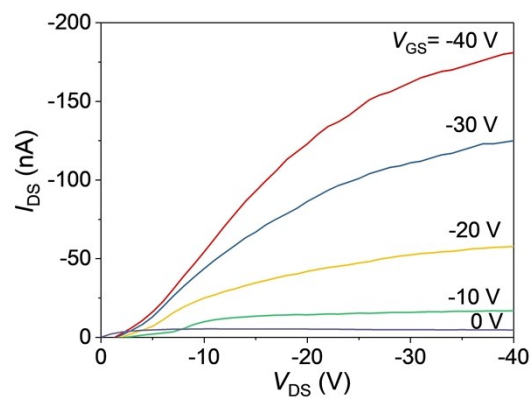

**Fig. S4** Output curves of the optimized C8-BTBT:AgBiS<sub>2</sub> hybrid films based phototransistors in dark.

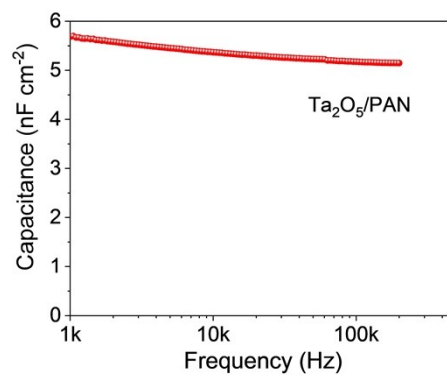

**Fig. S5** The capacitance as a function of frequency of Ta<sub>2</sub>O<sub>5</sub>/PAN double dielectric layers.

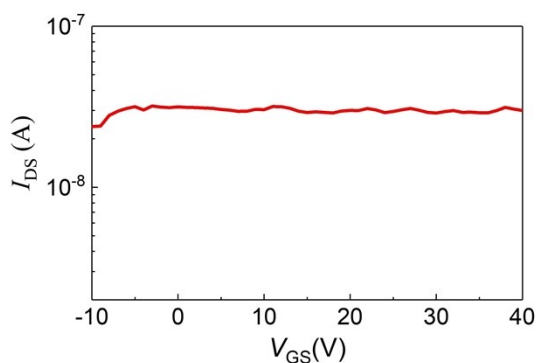

**Fig. S6** Typical field-dependent  $I_{DS}$  of the devices based on pure  $\text{AgBiS}_2$  QDs, indicating negligible field-effect transistor performance.

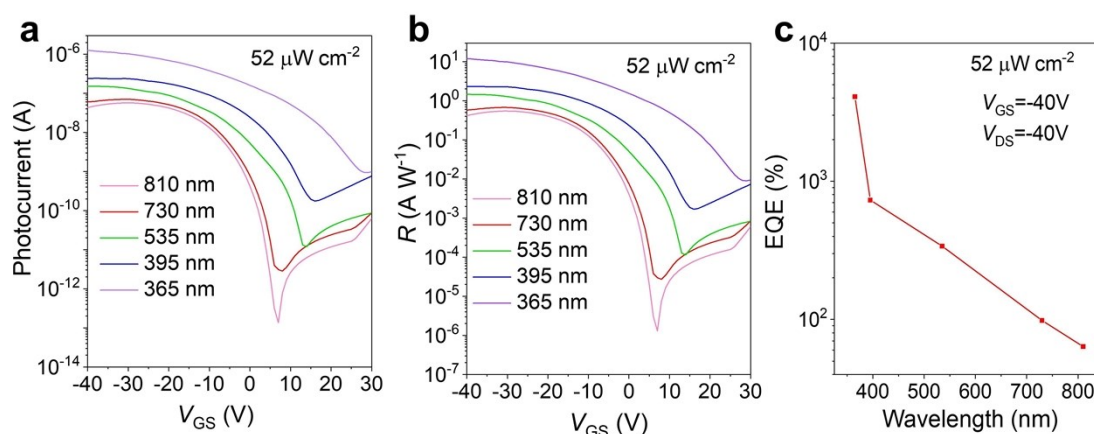

**Fig. S7** (a) Photocurrent and (b) responsivity of the hybrid phototransistors illuminated with various wavelength photons as a function of gate voltage, and (c) calculated EQE versus wavelengths.

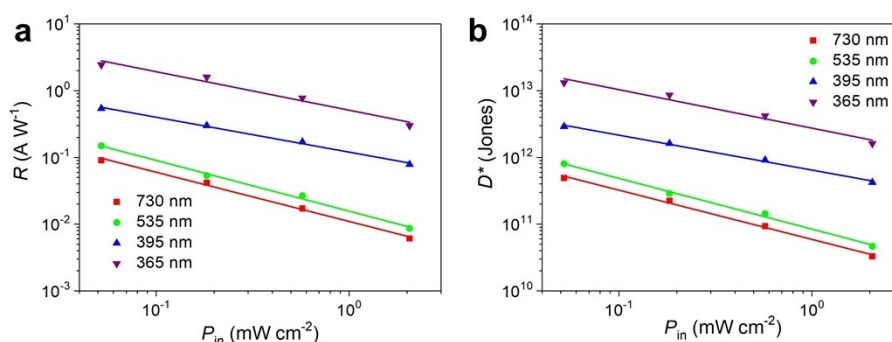

**Fig. S8** (a) Responsivity and (b) specific detectivity as a function of light intensities under illumination with various wavelengths.

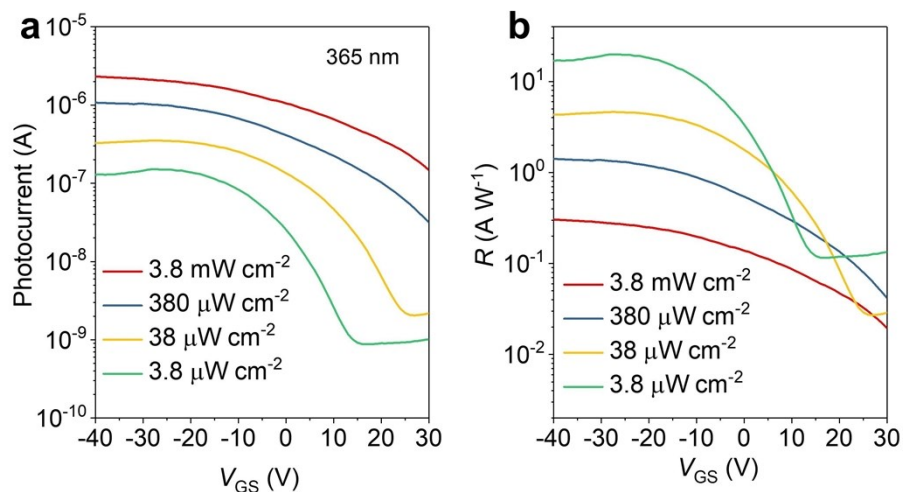

**Fig. S9** (a) Photocurrent and (b) responsivity of the blend films based phototransistors under 365 nm LED with different light intensities.

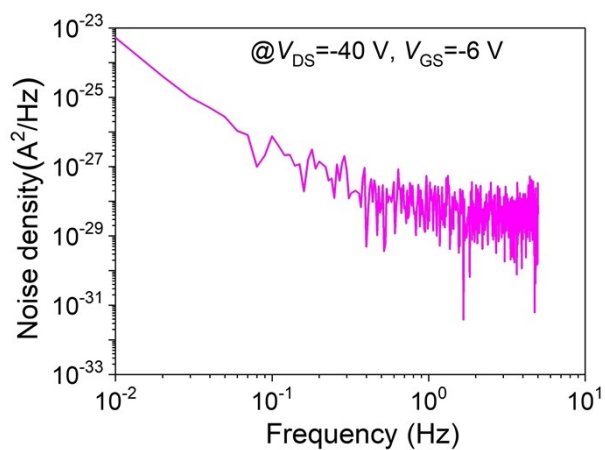

**Fig. S10** Noise density of the blend films based phototransistors at  $V_{DS} = -40 \text{ V}$  and  $V_{GS} = -6 \text{ V}$ .

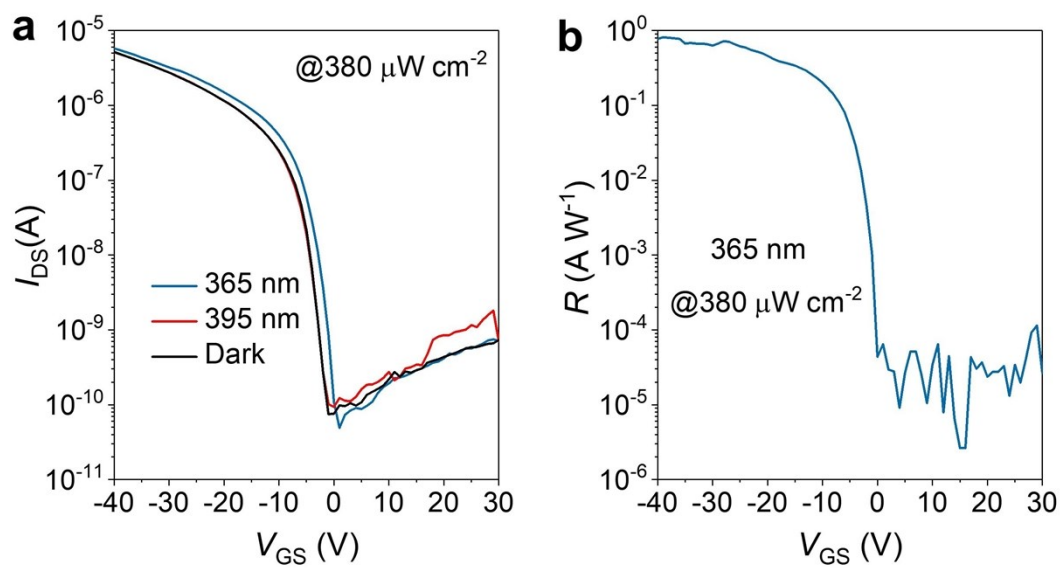

**Fig. S11 (a)** Transfer curves of C8-BTBT phototransistors in dark, and under 365 nm and 395 nm LEDs, respectively, **(b)** responsivity of C8-BTBT phototransistors under 365 nm LED as a function of gate voltage.
